# Supplementary material for: Epigenome-Wide Association Study of Soluble Tumor Necrosis Factor Receptor 2 Levels in the Framingham Heart Study
Source: PubMed Central journal article supplement (PMC5928448; doi:10.3389/fphar.2018.00207), 2018-04-24

Supplemental Figure 1. Distribution of sTNFR2 levels in the Framingham Heart Study Offspring cohort participants (examination 8; 2005-2008)

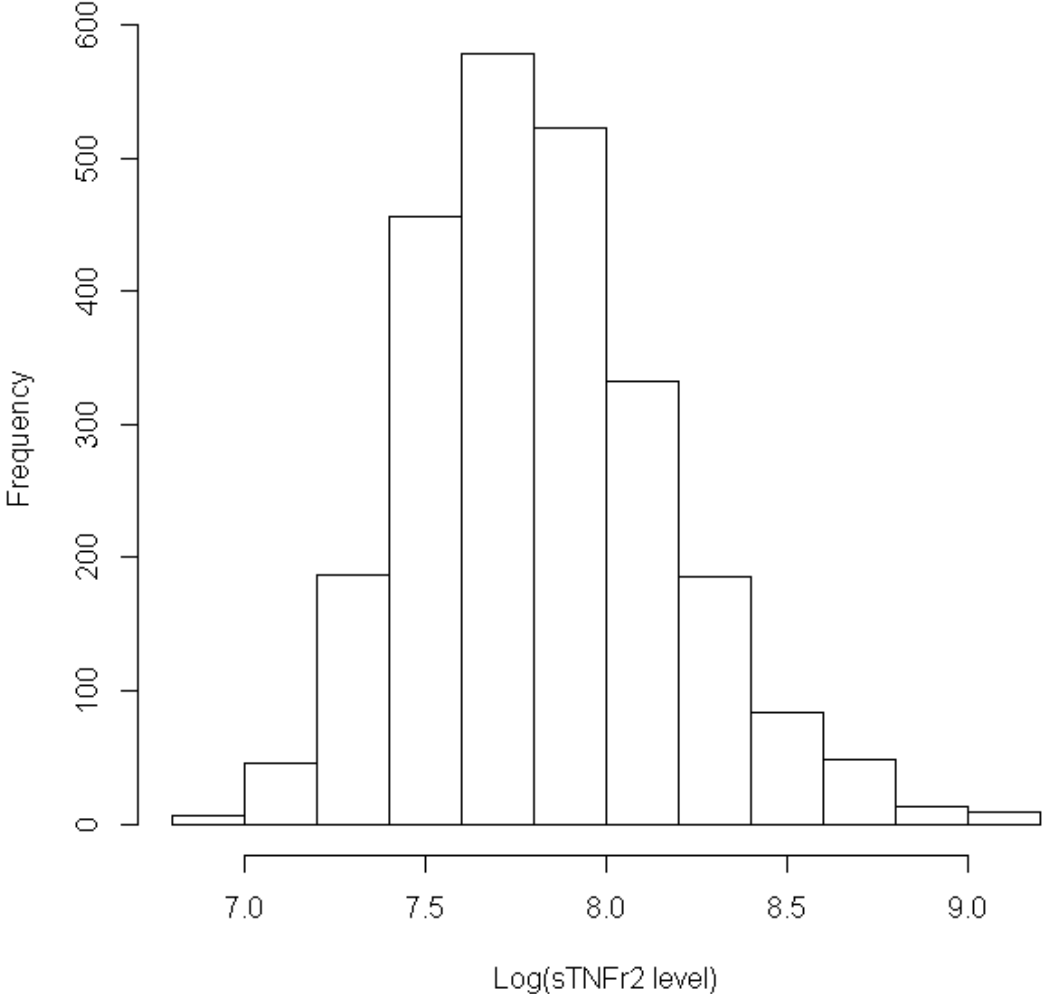

## Supplemental Figure 2. Enrichment of sTNFR2-related CpG sites in regulatory regions

### Consolidated Roadmap Epigenomics – DNase Hypersensitivity Sites

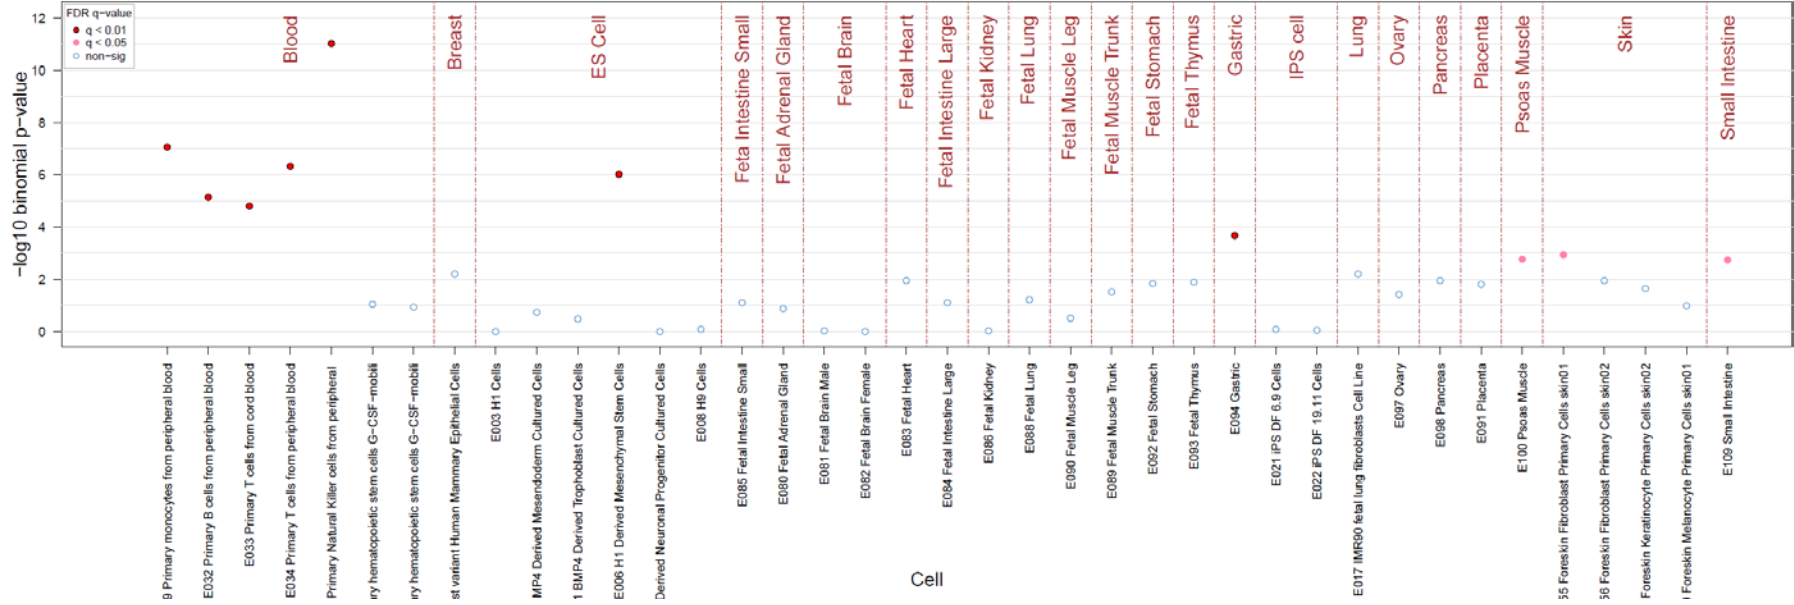

### Roadmap Epigenomics (2012) – DNase Hypersensitivity Sites

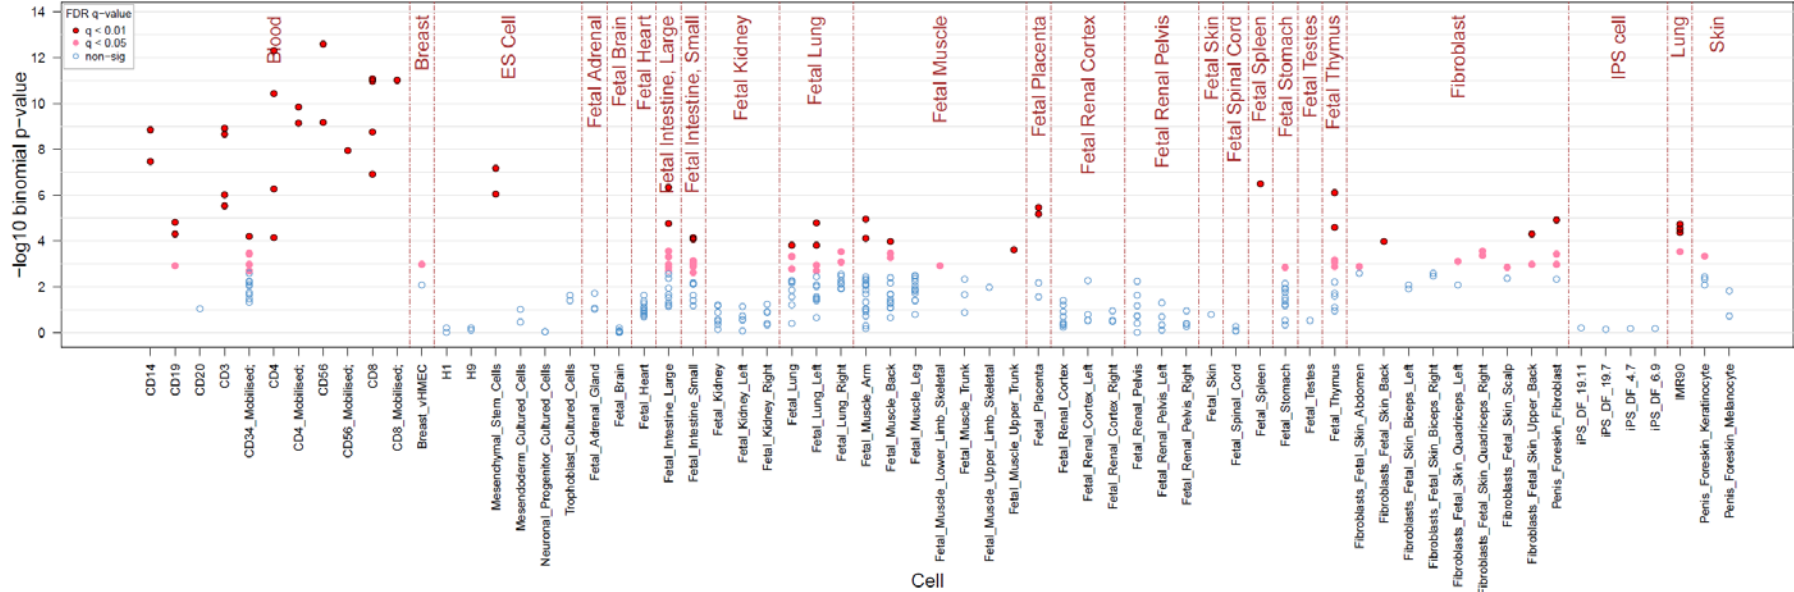

## ENCODE – DNase Hypersensitivity Sites

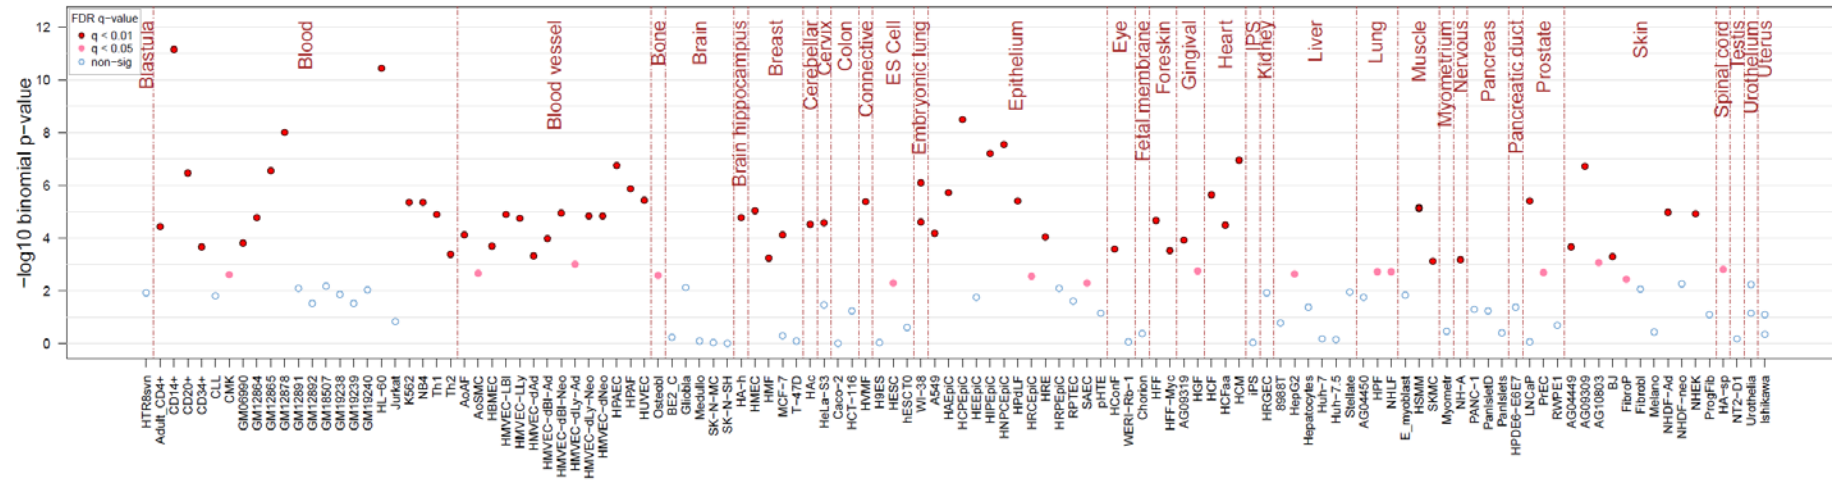

## Blueprint Epigenomics – DNase Hypersensitivity Sites

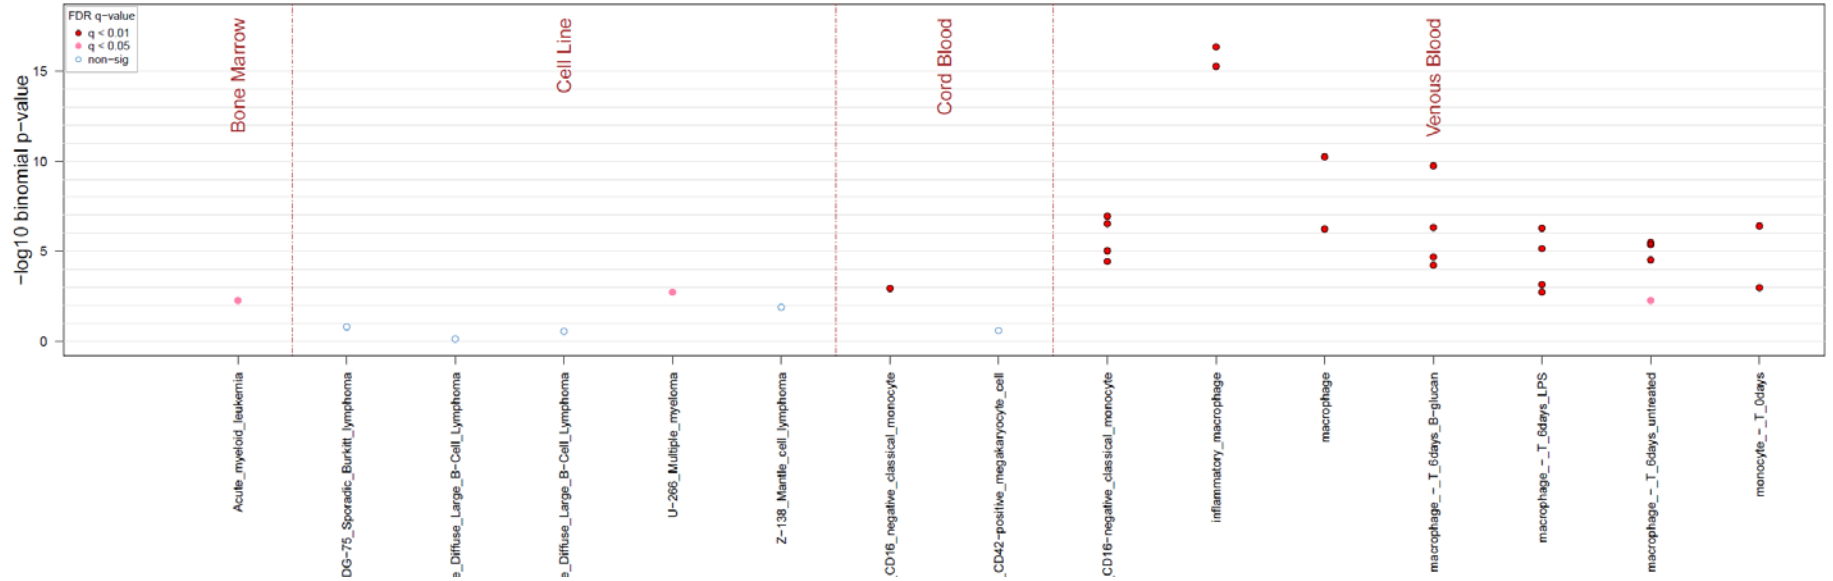

Supplement: Image_1.pdf [file Image_1.pdf]
